# Supplementary material for: Temporal regulation of notch activation improves arteriovenous fistula maturation
Source: Springer Nature journal article supplement (doi:10.1186/s12967-022-03727-7), 2022-11-23
Supplement: MOESM1 [file 23745838]

**A**

**Common carotid artery**

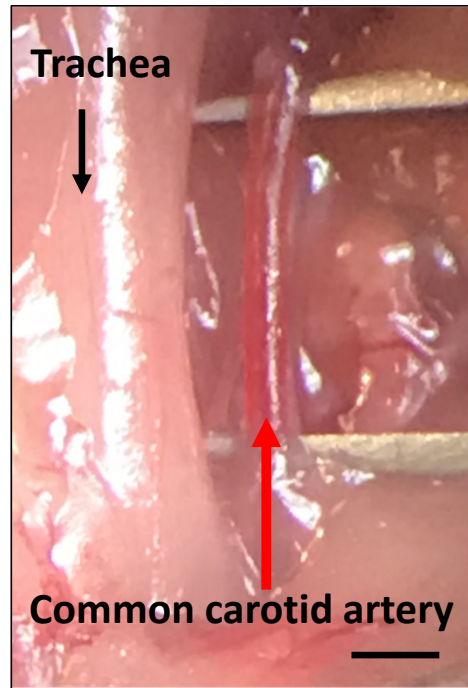

**B**

**AVF**

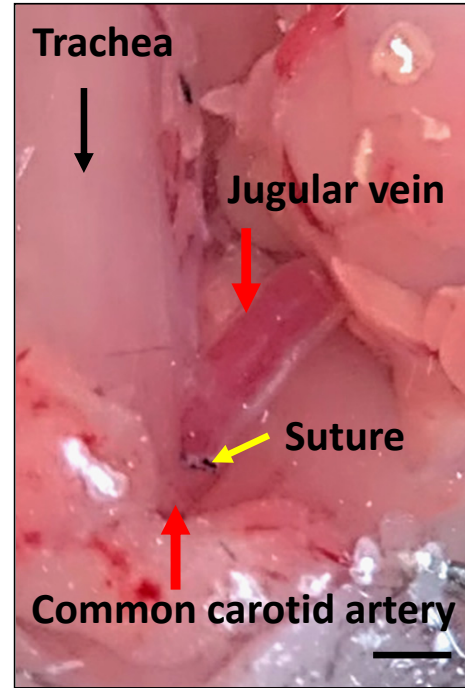

**Supplemental figure 1**

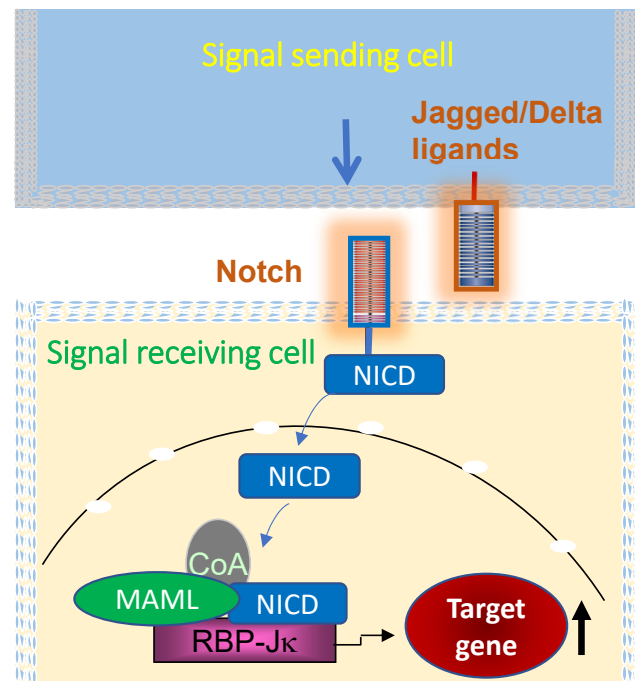

Supplemental figure 2

A

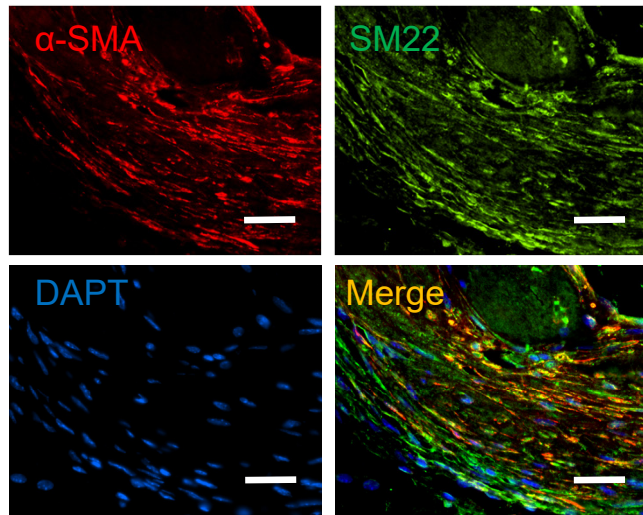

B

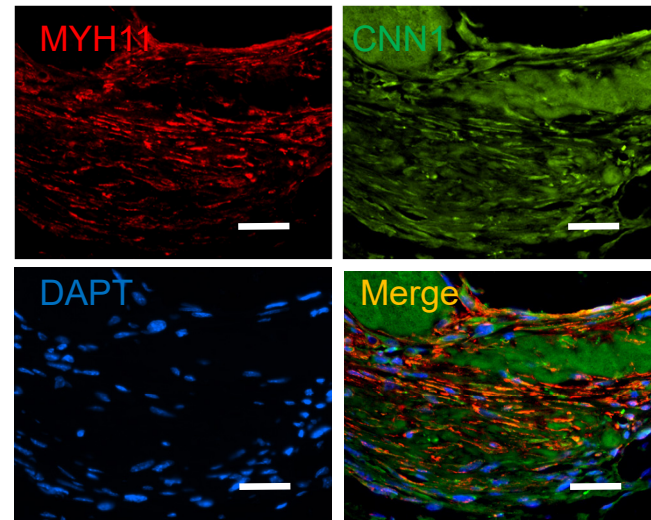

Supplemental figure 3

mT/mG/SMMHC-ERCre<sup>+</sup> mice

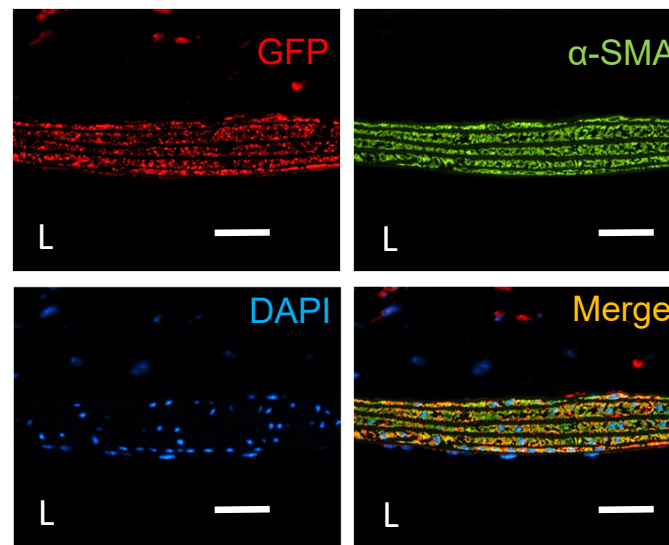

Supplemental figure 4
