# Supplementary material for: Temporal regulation of notch activation improves arteriovenous fistula maturation
Source: Springer Nature journal article supplement (doi:10.1186/s12967-022-03727-7), 2022-11-23
Supplement: MOESM2 [file 23745838]

## Supplemental Table

**Table S1. List of antibodies used in this study**

| Antibody       | company        | Catalog number | Working dilution | Host   |
|----------------|----------------|----------------|------------------|--------|
| Calponin       | Sigma          | C2687          | 1 : 2000         | Rabbit |
| $\alpha$ -SMA  | Sigma          | F4777          | 1 : 100          | Mouse  |
| $\alpha$ -SMA  | Sigma          | A5228          | 1 : 3200         | Mouse  |
| $\beta$ -actin | Sigma          | A5441          | 1 : 2000         | Mouse  |
| PCNA           | Santa Cruz     | sc-7907        | 1 : 500          | Rabbit |
| ICAM           | Santa Cruz     | sc-71303       | 1 : 1000         | Mouse  |
| IL-1 $\beta$   | Santa Cruz     | sc-32294       | 1 : 1000         | mouse  |
| Transgelin     | Santa Cruz     | sc-18513       | 1 : 200          | Goat   |
| GAPDH          | Santra Cruz    | sc-32233       | 1 : 1000         | Mouse  |
| PCNA           | abcam          | ab92552        | 1 : 500          | Rabbit |
| $\alpha$ -SMA  | abcam          | ab5694         | 1 : 500          | Rabbit |
| GFP            | abcam          | ab6556         | 1 : 2000         | Rabbit |
| F4/80          | abcam          | ab6640         | 1 : 250          | Rat    |
| CD45           | BD Parmingen   | 553076         | 1 : 400          | Rat    |
| VE-cadherin    | BD Parmingen   | 550548         | 1 : 300          | Rat    |
| PECAM (CD31)   | Cedarlane      | DIA-310-M      | 1 : 50           | Rat    |
| Mac2           | Cedarlane      | CL8942AP       | 1 : 500          | Rat    |
| RBP-Jk         | Cell Signaling | 5313           | 1 : 500          | Rabbit |
| Control IgG    | Vector Labs    | S-5000         | 1 : 200          | Rabbit |
